# Supplementary material for: SARS-CoV-2 Accessory Protein ORF8 Decreases Antibody-Dependent Cellular Cytotoxicity
Source: MDPI journal article supplement (doi:10.3390/v14061237), 2022-06-07
Supplement: s1 [file s1]

**A**

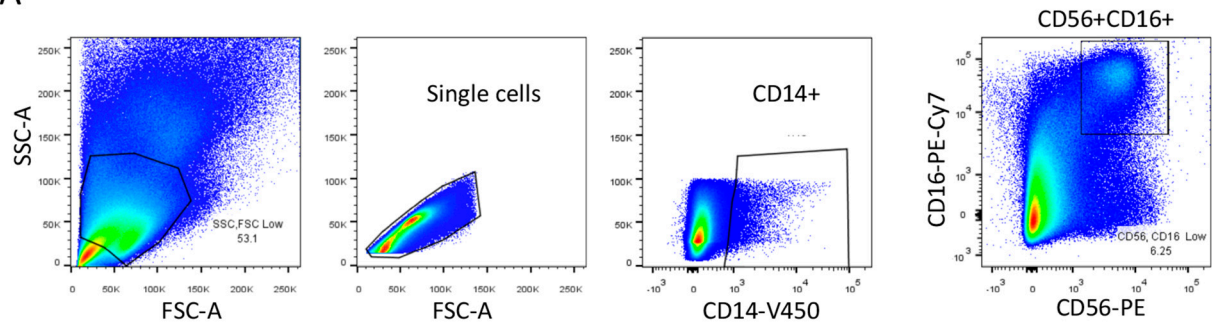

**B**

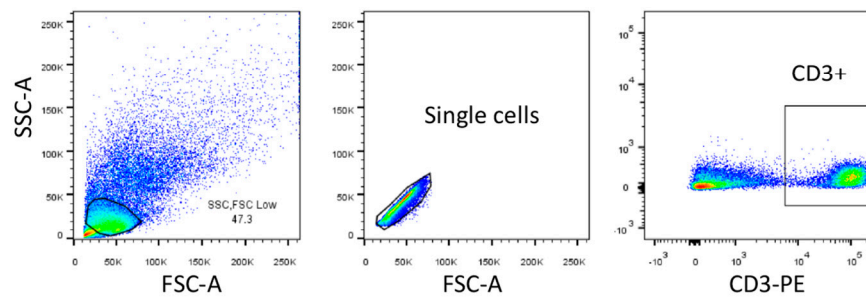

**Supplementary Figure S1. ORF8 binding to PBMCs. (A)** Gating strategy for CD14<sup>+</sup> monocytes and CD56<sup>+</sup>CD16<sup>+</sup> NK cells. Anti-CD14-V450, anti-CD56-PE and anti-CD16-PE-Cy7 were used to stain PBMCs. **(B)** Gating strategy for CD3<sup>+</sup> T cells. PBMCs were incubated with anti-CD3-PE antibody on ice for 1 hour to label CD3<sup>+</sup> T cells.

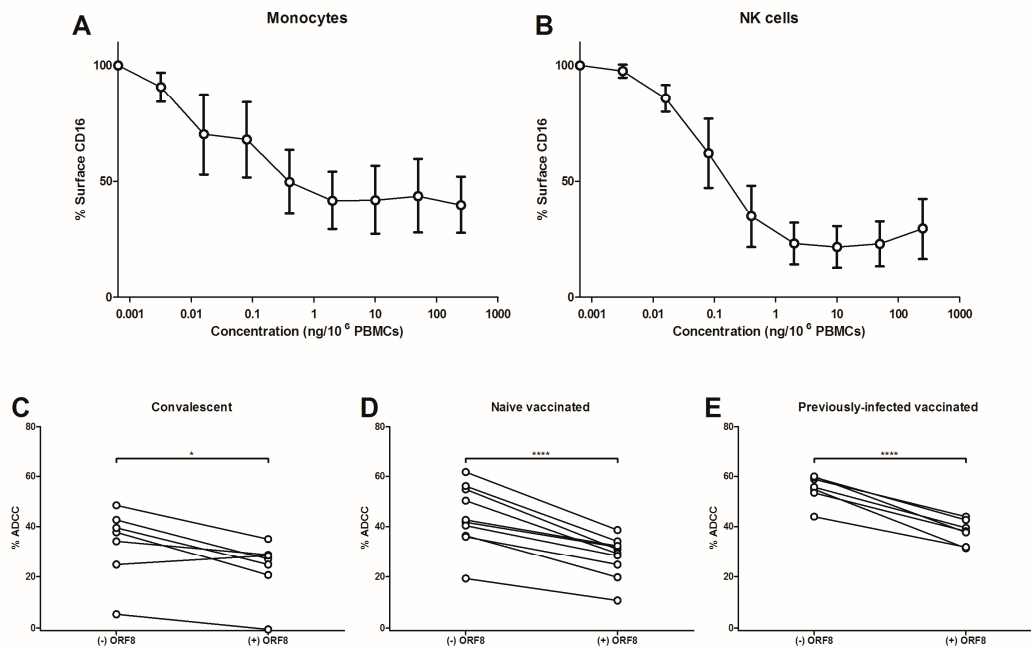

**Supplementary Figure S2. Effects of recombinant ORF8 on CD16 surface level and ADCC.** PBMCs from 2 different donors were thawed and incubated overnight (16 hours) with increasing concentrations of recombinant ORF8 (from 3.2 pg/10<sup>6</sup> PBMCs to 250 ng/10<sup>6</sup> PBMCs). Following treatment, PBMCs were stained and flow cytometry was used to separate (A) Monocytes and (B) NK cells. (C) ADCC (%) mediated by plasma from 7 convalescent individuals, (D) 10 vaccinated individuals and (E) 7 previously-infected vaccinated individuals using PBMCs from a healthy donor as effector cells. The PBMCs were treated overnight (16 hours) with media from ORF8 DNA-transfected HEK293T cells (+ORF8) or with an identical volume of conditioned media collected from HEK293T cells transfected with a control plasmid (-ORF8). Statistical significance was evaluated using a parametric t-test for (C), (D) and (E). \*,  $p < 0.05$ ; \*\*\*\*,  $p < 0.0001$ . (A) and (B) Cell-surface CD16 levels in presence of ORF8 were normalized on cell-surface CD16 detected in absence of ORF8. Mean values  $\pm$  the standard error of the mean (SEM).

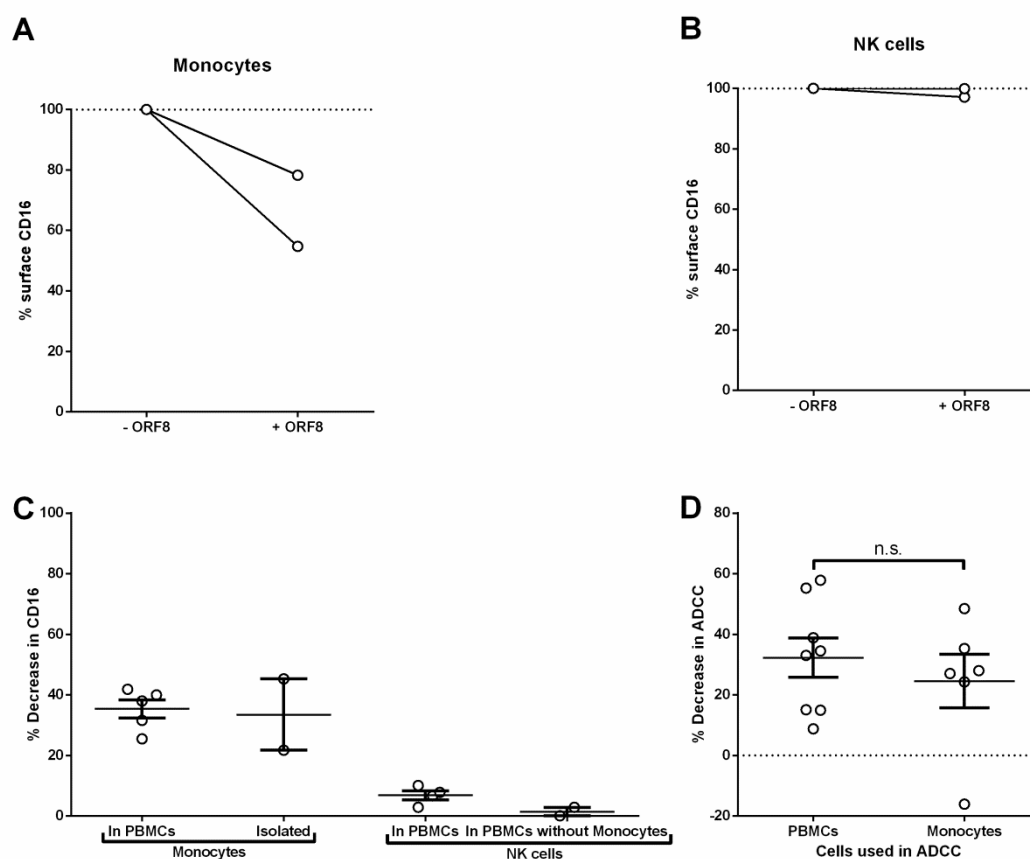

**Supplementary Figure S3. ORF8 modulation of CD16 levels at the surface of purified monocytes and NK cells.** (A) Purified monocytes from PBMCs were treated (16 hours) or not with ORF8 and cell surface levels of CD16 were measured by flow cytometry,  $n=2$ . (B) Monocytes-depleted PBMCs were treated (16 hours) or not with ORF8 and CD16 levels were measured at the surface of NK cells,  $n=2$ . Purified monocytes and monocytes-depleted PBMCs were treated with media from ORF8 DNA-transfected HEK293T cells (+ORF8) or with an identical volume of conditioned media collected from HEK293T cells transfected with a control plasmid (-ORF8). (C) Decrease of surface CD16 after ORF8 treatment on monocytes present in the PBMC population, on isolated monocytes, on NK cells in the PBMC population and on NK cells in monocytes-depleted PBMCs. (D) Decrease of ADCC mediated by PBMCs or purified monocytes after treatment with ORF8 for 16 hours. Statistical significance was evaluated using a non-parametric Mann-Whitney test for (D). n.s., not significant. (C) and (D) Mean values  $\pm$  the standard error of the mean (SEM).

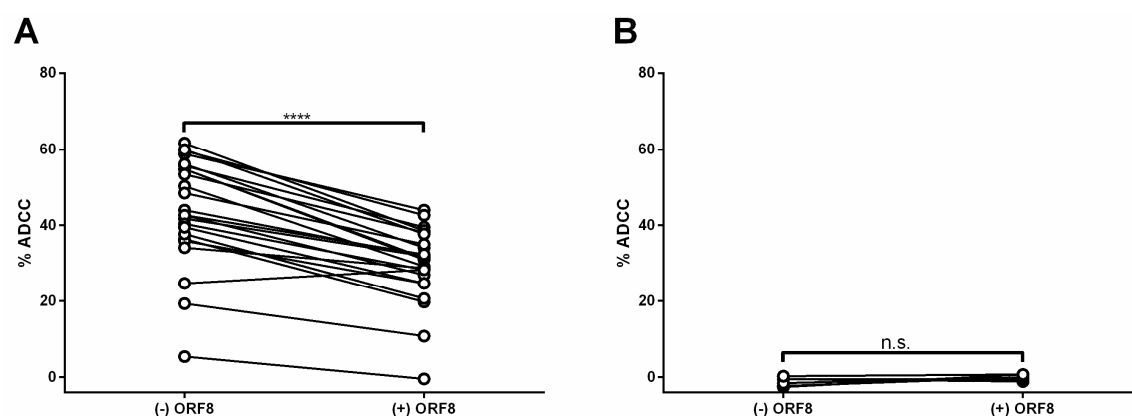

**Supplementary Figure S4. Impact of ORF8 on ADCC mediated by plasma from uninfected/unvaccinated and infected and/or vaccinated individuals.** ADCC mediated by plasma from infected and/or vaccinated individuals (**A**) or uninfected and unvaccinated individuals (**B**) performed in the presence (+) or absence (-) of recombinant ORF8 (0,05 µg ORF8/106 PBMCs). Data was tested for normality and a paired t-test was used to calculate significance of the data. \*\*\*\* :  $p < 0.0001$ ; n.s. : non-significant ( $p > 0.05$ ).
